# Supplementary material for: A two-phase approach to fourier transform ion mobility time-of-flight mass spectrometry
Source: Royal Society of Chemistry journal article supplement (doi:10.1039/c5an00941c), 2015-01-01
Supplement: c5an00941c2.xlsx [file c5an00941c2.xlsx]

## Sheet: Sheet1
mz	Frequency Range	Sweep Time	HzPerS	FWHM	Height	Location (s)	Corrected Drift Time (s)	Res Power	SNR
130	2500	8	312.5	0.000741929	37400000	0.0380087	0.0267169	51.2295	194.617
130	5000	8	625	0.000404247	68900000	0.0379601	0.0266822	93.9032	208.141
130	7500	8	937.5	0.000383669	16200000	0.0380429	0.0267413	99.1553	79.0849
130	8333	8	1041.62	0.000402386	12800000	0.0380645	0.0267568	94.5969	58.0069
130	10000	8	1250	0.000397136	17000000	0.0382096	0.0268604	96.2128	58.4242
130	2500	4	625	0.00101418	57500000	0.0324649	0.0273905	32.0111	184.291
130	5000	4	1250	0.000482232	69300000	0.0323709	0.0273099	67.1272	168.756
130	7500	4	1875	0.000450261	22000000	0.0324786	0.0274023	72.1328	71.5217
130	8333	4	2083.25	0.000441131	45000000	0.0324829	0.0274059	73.6355	93.0574
130	10000	4	2500	0.000451053	84100000	0.0325779	0.0274874	72.2264	100.276
130	2500	2	1250	0.00121915	27300000	0.0293216	0.0267889	24.0509	78.7858
130	5000	2	2500	0.00037588	23800000	0.0290955	0.0265789	77.4064	96.092
130	7500	2	3750	0.000270114	2570000	0.0290943	0.0265778	107.711	31.3313
130	8333	2	4166.5	0.000348326	1020000	0.0290977	0.026581	83.536	15.2164
130	10000	2	5000	0.000391282	1230000	0.0291529	0.0266322	74.5061	12.7441
130	2500	1	2500	0.000591898	11700000	0.0283767	0.0269242	47.9419	81.8408
130	5000	1	5000	0.000400064	4160000	0.0282509	0.0268029	70.6159	41.1843
130	7500	1	7500	0.00028089	36500000	0.0282324	0.026785	100.51	84.0894
130	8333	1	8333	0.000291463	39900000	0.0282296	0.0267823	96.8548	79.8583
130	10000	1	10000	0.000242713	22400000	0.0282365	0.026789	116.337	60.4838
186	2500	8	312.5	0.000712925	138000000	0.043963	0.0326932	61.6657	231.799
186	5000	8	625	0.00046376	29100000	0.0439278	0.0326668	94.7209	111.296
186	7500	8	937.5	0.00041733	20600000	0.0440236	0.0327387	105.489	65.0978
186	8333	8	1041.62	0.00040481	26000000	0.0440318	0.0327449	108.772	65.3267
186	10000	8	1250	0.000445804	19100000	0.0441963	0.0328685	99.1385	49.3326
186	2500	4	625	0.000839351	119000000	0.0384371	0.0333242	45.7939	214.784
186	5000	4	1250	0.00055783	72900000	0.0384109	0.0333013	68.8577	141.834
186	7500	4	1875	0.000457951	41800000	0.0385078	0.0333861	84.087	80.4009
186	8333	4	2083.25	0.000460285	46900000	0.0385253	0.0334015	83.6989	74.191
186	10000	4	2500	0.000456939	34300000	0.0386129	0.0334782	84.5035	63.9589
186	2500	2	1250	0.000754183	54700000	0.0350737	0.032561	46.5056	107.805
186	5000	2	2500	0.000423023	12900000	0.0350139	0.032505	82.7708	66.5944
186	7500	2	3750	0.000387659	2490000	0.0350239	0.0325143	90.3473	18.8483
186	8333	2	4166.5	0.000444634	1410000	0.0350493	0.0325382	78.8273	12.4916
186	10000	2	5000	0.000408417	836627	0.0350264	0.0325167	85.7615	8.2894
186	2500	1	2500	0.00054233	9410000	0.0343277	0.0329291	63.2968	62.4044
186	5000	1	5000	0.000399478	32100000	0.0342568	0.0328604	85.7539	73.8186
186	7500	1	7500	0.000385484	31200000	0.0342267	0.0328313	88.7888	58.6481
186	8333	1	8333	0.000396375	20900000	0.034216	0.0328209	86.3225	46.1853
186	10000	1	10000	0.000367961	7090000	0.0342403	0.0328444	93.0543	26.6656
242	2500	8	312.5	0.000713105	1410000000	0.0499428	0.0386721	70.0356	877.665
242	5000	8	625	0.000522231	313000000	0.0499432	0.0386724	95.6342	244.576
242	7500	8	937.5	0.00048344	226000000	0.0500125	0.0387264	103.451	174.218
242	8333	8	1041.62	0.00047846	225000000	0.0500314	0.0387412	104.568	144.891
242	10000	8	1250	0.000479722	143000000	0.050192	0.0388663	104.627	105.168
242	2500	4	625	0.000773603	1320000000	0.0444425	0.0392839	57.4487	414.723
242	5000	4	1250	0.000605084	715000000	0.0444731	0.0393112	73.4991	232.796
242	7500	4	1875	0.000528569	358000000	0.0445694	0.0393969	84.3207	151.734
242	8333	4	2083.25	0.000540128	321000000	0.0445531	0.0393824	82.4862	119.093
242	10000	4	2500	0.000534325	170000000	0.0446677	0.0394843	83.5964	90.4635
242	2500	2	1250	0.000748855	305000000	0.0409946	0.0384758	54.743	134.358
242	5000	2	2500	0.00045939	95400000	0.0409687	0.0384513	89.1806	118.923
242	7500	2	3750	0.000505481	76800000	0.0409969	0.038478	81.1046	45.2931
242	8333	2	4166.5	0.00066865	3480000	0.0410232	0.0385028	61.3523	16.6262
242	10000	2	5000	0.000659299	22300000	0.0411698	0.0386414	62.4448	30.0505
242	2500	1	2500	0.000551695	215000000	0.0403258	0.0389553	73.0943	140.81
242	5000	1	5000	0.000470168	353000000	0.0402518	0.0388833	85.6117	107.223
242	7500	1	7500	0.000466271	209000000	0.0402251	0.0388574	86.2698	79.6408
242	8333	1	8333	0.000457384	122000000	0.0402426	0.0388744	87.9843	56.7822
242	10000	1	10000	0.000465111	47700000	0.0402597	0.038891	86.5595	45.6584
354	2500	8	312.5	0.000792446	1370000000	0.062433	0.0510503	78.7852	425.65
354	5000	8	625	0.000683407	365000000	0.0624553	0.0510686	91.3881	211.387
354	7500	8	937.5	0.000679494	210000000	0.0625069	0.0511109	91.9904	102.091
354	8333	8	1041.62	0.000663137	177000000	0.0625257	0.0511263	94.2879	82.3796
354	10000	8	1250	0.000657534	110000000	0.0626981	0.0512678	95.3533	71.1339
354	2500	4	625	0.000744544	1600000000	0.0569999	0.0517109	76.5567	225.263
354	5000	4	1250	0.000715517	757000000	0.0570883	0.0517914	79.7861	140.153
354	7500	4	1875	0.000695846	326000000	0.0571658	0.0518619	82.1529	76.9933
354	8333	4	2083.25	0.000706159	242000000	0.0571782	0.0518732	80.9708	81.0794
354	10000	4	2500	0.000682053	118000000	0.0572747	0.051961	83.974	48.9005
354	2500	2	1250	0.000723737	479000000	0.0534478	0.0508773	73.8498	134.038
354	5000	2	2500	0.000668349	111000000	0.0534247	0.0508553	79.9353	82.1884
354	7500	2	3750	0.000878519	59300000	0.0536064	0.0510288	61.0191	35.3136
354	8333	2	4166.5	0.000718705	16100000	0.0535466	0.0509717	74.5043	19.1597
354	10000	2	5000	0.000826672	60800000	0.0537097	0.0511275	64.971	31.0106
354	2500	1	2500	0.000763564	480000000	0.0528947	0.0515364	69.2735	89.7821
354	5000	1	5000	0.000655262	356000000	0.0528163	0.0514598	80.6033	71.6351
354	7500	1	7500	0.000638184	158000000	0.0528173	0.0514607	82.7618	46.5546
354	8333	1	8333	0.000689554	90700000	0.0528313	0.0514744	76.6166	37.7426
354	10000	1	10000	0.000752809	31000000	0.0528825	0.0515245	70.2468	25.4609
410	2500	8	312.5	0.000836967	224000000	0.0683337	0.0569616	81.6445	287.067
410	5000	8	625	0.000715474	66100000	0.0683458	0.0569717	95.5252	106.635
410	7500	8	937.5	0.000778273	36400000	0.068417	0.0570312	87.9087	58.7996
410	8333	8	1041.62	0.000725396	28200000	0.0684258	0.0570386	94.3288	43.0004
410	10000	8	1250	0.000754359	16200000	0.0685775	0.0571654	90.9084	28.9583
410	2500	4	625	0.000821852	297000000	0.0629929	0.0576746	76.6475	235.004
410	5000	4	1250	0.000761693	131000000	0.0630787	0.0577533	82.8138	100.48
410	7500	4	1875	0.000816271	52600000	0.0631659	0.0578334	77.3835	43.8102
410	8333	4	2083.25	0.000760766	39600000	0.0631105	0.0577825	82.9564	43.4704
410	10000	4	2500	0.000843261	14600000	0.0632942	0.0579511	75.0588	20.9962
410	2500	2	1250	0.00086498	45900000	0.0593108	0.0567318	68.569	79.804
410	5000	2	2500	0.000769014	13100000	0.0593527	0.056772	77.1803	29.5737
410	7500	2	3750	0.000962307	9370000	0.0594978	0.0569111	61.8283	15.5029
410	8333	2	4166.5	0.00082287	5020000	0.0594904	0.056904	72.2962	14.8743
410	10000	2	5000	0.000943229	12700000	0.0596706	0.0570768	63.2621	18.4593
410	2500	1	2500	0.000792315	92500000	0.0588068	0.0574565	74.2214	67.8761
410	5000	1	5000	0.0007485	54800000	0.0588049	0.0574547	78.5636	42.1128
410	7500	1	7500	0.000825137	19600000	0.0588146	0.0574642	71.2785	22.1662
410	8333	1	8333	0.000736471	14500000	0.0587737	0.0574241	79.8045	22.8865
410	10000	1	10000	0.000880609	4810000	0.0588721	0.0575205	66.8538	12.4491
466	2500	8	312.5	0.000889507	46800000000	0.0740356	0.062701	83.2321	571.834
466	5000	8	625	0.000839484	12600000000	0.0740806	0.0627391	88.2454	253.159
466	7500	8	937.5	0.000811956	6750000000	0.0741129	0.0627666	91.277	217.166
466	8333	8	1041.62	0.000820745	5100000000	0.0741505	0.0627985	90.3454	184.29
466	10000	8	1250	0.000831889	2980000000	0.0743142	0.0629374	89.332	116.172
466	2500	4	625	0.000891792	61500000000	0.0687481	0.0634214	77.0899	369.307
466	5000	4	1250	0.000874971	20700000000	0.0688503	0.0635159	78.6886	213.006
466	7500	4	1875	0.000884738	8700000000	0.0689446	0.063603	77.9266	130.484
466	8333	4	2083.25	0.000869112	6200000000	0.0689316	0.063591	79.3126	120.006
466	10000	4	2500	0.000881163	3260000000	0.0690385	0.0636898	78.3493	84.7368
466	2500	2	1250	0.000882388	12500000000	0.0650084	0.0624268	73.6732	105.14
466	5000	2	2500	0.000976506	3700000000	0.0650495	0.0624664	66.6145	83.2963
466	7500	2	3750	0.00104087	2370000000	0.0652897	0.0626975	62.7263	20.673
466	8333	2	4166.5	0.00105058	1540000000	0.0652795	0.0626876	62.1369	32.4196
466	10000	2	5000	0.00101842	3070000000	0.0654007	0.0628043	64.2176	51.1398
466	2500	1	2500	0.000842509	28000000000	0.0645889	0.0632462	76.6626	96.7385
466	5000	1	5000	0.00083559	12100000000	0.06456	0.0632178	77.2627	76.3181
466	7500	1	7500	0.000911093	4460000000	0.0645894	0.0632467	70.8922	52.3432
466	8333	1	8333	0.000917386	2880000000	0.0645938	0.063251	70.4107	47.7997
466	10000	1	10000	0.00105405	1010000000	0.0646947	0.06335	61.3771	32.7933
578	2500	8	312.5	0.000968786	203000000	0.0846408	0.0734673	87.3679	210.23
578	5000	8	625	0.000867354	61700000	0.0846727	0.073495	97.6218	74.0978
578	7500	8	937.5	0.00103145	29000000	0.0847343	0.0735486	82.1508	37.5666
578	8333	8	1041.62	0.000973355	20400000	0.0847491	0.0735614	87.069	25.4376
578	10000	8	1250	0.00101631	11000000	0.0849752	0.0737579	83.6119	17.112
578	2500	4	625	0.00106163	316000000	0.0794475	0.0741574	74.8352	149.337
578	5000	4	1250	0.000983112	116000000	0.0795228	0.0742278	80.8889	68.2729
578	7500	4	1875	0.00103057	48700000	0.0796166	0.0743154	77.2546	36.232
578	8333	4	2083.25	0.000988737	31500000	0.079594	0.0742943	80.5008	31.3996
578	10000	4	2500	0.00106033	14900000	0.0797548	0.0744446	75.2171	17.4451
578	2500	2	1250	0.00103008	21700000	0.0756386	0.0730748	73.4296	46.4406
578	5000	2	2500	0.00124688	13300000	0.0757946	0.0732257	60.7873	24.1966
578	7500	2	3750	0.00123259	9140000	0.0759622	0.0733878	61.628	11.5066
578	8333	2	4166.5	0.00112344	8220000	0.0759552	0.073381	67.6096	10.3956
578	10000	2	5000	0.00112496	15300000	0.0760601	0.0734825	67.6117	13.8912
578	2500	1	2500	0.000982446	158000000	0.0752482	0.0739292	76.5927	52.82
578	5000	1	5000	0.00103485	54100000	0.0752597	0.0739405	72.7252	30.3282
578	7500	1	7500	0.0010665	19500000	0.0753127	0.0739927	70.6169	16.3494
578	8333	1	8333	0.00132776	10000000	0.0753476	0.074027	56.7481	11.4285
578	10000	1	10000	0.00137999	4280000	0.0755096	0.0741863	54.7174	8.86622
690	2500	8	312.5	0.00110959	2620000000	0.0940661	0.0831489	84.7758	202.897
690	5000	8	625	0.00111558	713000000	0.0941142	0.0831914	84.3634	94.0939
690	7500	8	937.5	0.0010877	386000000	0.0941494	0.0832226	86.5579	58.6152
690	8333	8	1041.62	0.0011087	264000000	0.0941688	0.0832397	84.9365	50.0953
690	10000	8	1250	0.00117131	150000000	0.0943691	0.0834169	80.5669	35.8735
690	2500	4	625	0.00114555	4470000000	0.088979	0.0837816	77.6738	142.856
690	5000	4	1250	0.00112472	1300000000	0.0890529	0.0838512	79.1782	72.7348
690	7500	4	1875	0.00117967	541000000	0.0891546	0.083947	75.5762	52.9884
690	8333	4	2083.25	0.00118231	336000000	0.0891504	0.0839431	75.4033	40.5198
690	10000	4	2500	0.00118207	187000000	0.0892518	0.0840386	75.5044	35.6198
690	2500	2	1250	0.00120636	1580000000	0.0850565	0.0825386	70.5068	74.8342
690	5000	2	2500	0.001358	336000000	0.0851741	0.0826528	62.7204	40.5129
690	7500	2	3750	0.00144122	146000000	0.0854214	0.082893	59.2701	17.7578
690	8333	2	4166.5	0.00140762	155000000	0.0853972	0.0828695	60.6677	17.9001
690	10000	2	5000	0.00126564	252000000	0.0855117	0.0829807	67.5638	26.9682
690	2500	1	2500	0.00107092	2880000000	0.0847622	0.0834752	79.1488	52.1613
690	5000	1	5000	0.00123557	846000000	0.0848157	0.083528	68.6448	37.4133
690	7500	1	7500	0.00140161	279000000	0.0849327	0.0836433	60.5964	23.2362
690	8333	1	8333	0.0013476	182000000	0.0849465	0.0836569	63.0355	20.6163
690	10000	1	10000	0.00138995	70100000	0.085036	0.0837451	61.1794	16.2876
